# Supplementary material for: Effects of 60Co γ-ray irradiation of thin-layer molybdenum disulfide for the hydrogen evolution reaction
Source: Royal Society of Chemistry journal article supplement (doi:10.1039/d3nj00137g), 2023-01-01
Supplement: d3nj00137g1.pdf [file d3nj00137g1.pdf]

## Supporting information

### Effects of $^{60}\text{Co}$ $\gamma$ -ray irradiation of thin-layers molybdenum disulfide for hydrogen evolution reaction

Lei Dong,<sup>a</sup> Jianqun Yang,<sup>a</sup> Xiaoqing Yue,<sup>a</sup> Huimin Geng,<sup>a</sup> Weiqi Li,<sup>b</sup> Yubao Zhang<sup>c</sup> and Xingji Li\*<sup>a</sup>

- a. School of Materials Science and Engineering, Harbin Institute of Technology, Harbin, 150001, P. R. China.  
b. School of Physics, Harbin Institute of Technology, Harbin, 150001, P. R. China.  
c. Accelerator Center, Heilongjiang Institute of Atomic Energy, Harbin, 150086, P. R. China.  
E-mail: [lxj0218@hit.edu.cn](mailto:lxj0218@hit.edu.cn) (Xingji Li)

### Supplementary Figures

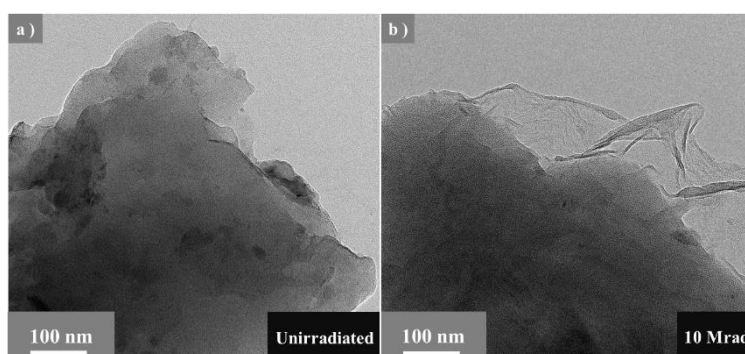

Figure S1 TEM images of MoS<sub>2</sub> NSs before and after  $\gamma$ -ray irradiation at a dose of 10 Mrad. (a) Pristine MoS<sub>2</sub> NSs; (b) MoS<sub>2</sub> NSs after 10 Mrad irradiation.

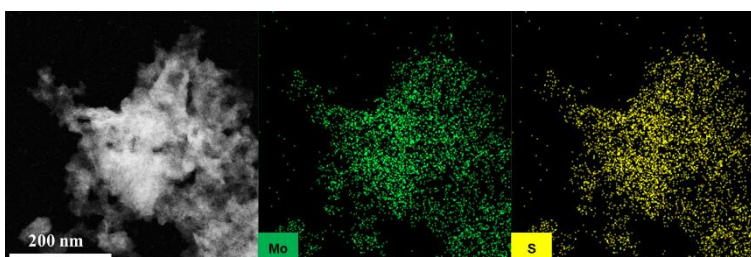

Figure S2 The EDX element mapping of pristine MoS<sub>2</sub> NSs.

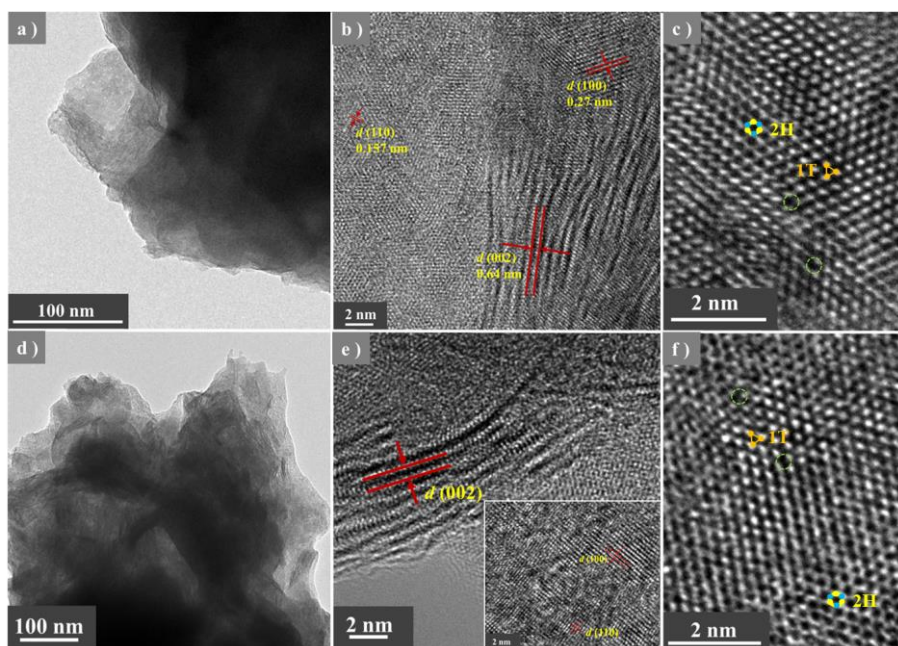

Figure S3 TEM images of irradiated MoS<sub>2</sub> NSs before and after stability test. (a) TEM image of irradiated MoS<sub>2</sub> NSs before stability test; (b) The typical lamellar structure within irradiated MoS<sub>2</sub> NSs before stability test; (c) HRTEM image of irradiated MoS<sub>2</sub> NSs before stability test; (d) TEM image of irradiated MoS<sub>2</sub> NSs after stability test; (e) The typical lamellar structure within irradiated MoS<sub>2</sub> NSs after stability test; (f) HRTEM image of irradiated MoS<sub>2</sub> NSs after stability test.

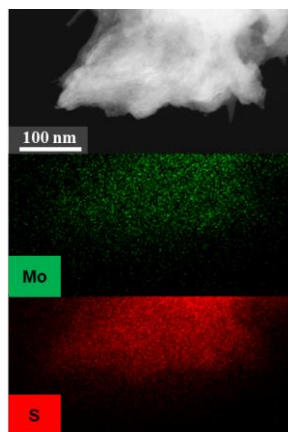

Figure S4 The EDX element mapping of irradiated MoS<sub>2</sub> NSs after stability test.
